# Supplementary material for: Epigenetic downregulation of the ISG15–conjugating enzyme UbcH8 impairs lipolysis and correlates with poor prognosis in nasopharyngeal carcinoma
Source: PubMed Central journal article supplement (PMC4747391; doi:10.18632/oncotarget.6218), 2015-10-12
Supplement: oncotarget-06-41077-s001.pdf [file oncotarget-06-41077-s001.pdf]

## SUPPLEMENTARY FIGURES AND TABLES

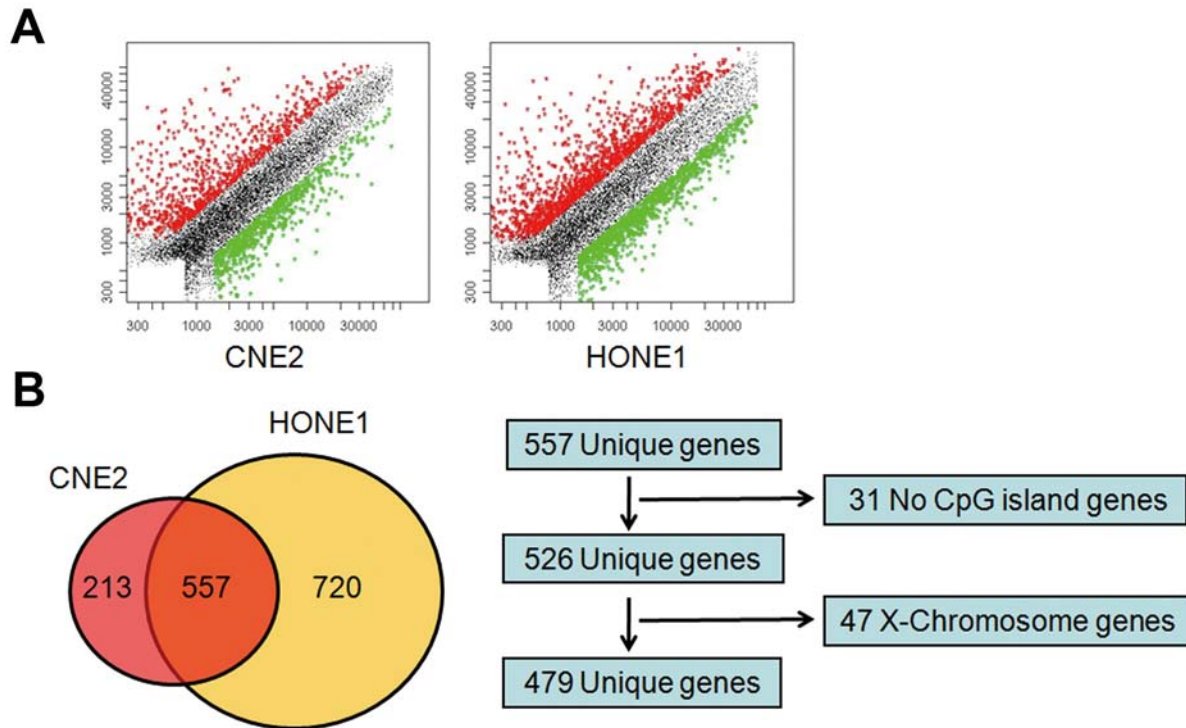

**Supplementary Figure S1: Genome-wide screening of genes inactivated by DNA methylation in multiple NPC cells.** **A.** Dot plots show the expression levels of genes altered by 5-aza-dC and TSA. Red dots represent genes, the expression levels of which were up-regulated after treatment, while green dots show genes that were down-regulated. **B.** Venn diagram depicts the distribution of up-regulated genes in two NPC cell lines. 557 genes were significantly up-regulated by 5-aza-dC and TSA in two NPC cell lines. Genes without CpG island in the 5' region and genes located at the X chromosome were excluded, after which 479 candidates remained for further investigation.

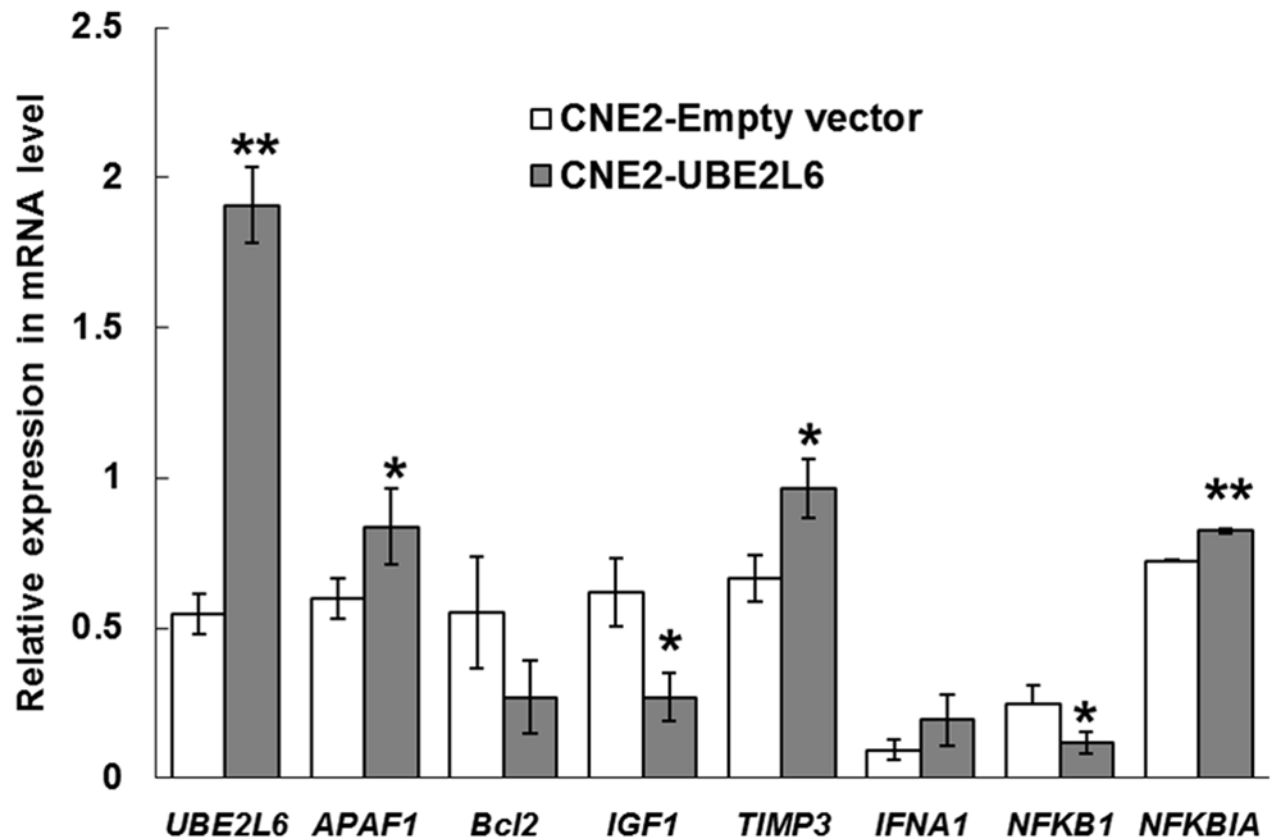

**Supplementary Figure S2: Gene expression analysis in CNE2 cells upon ectopic introduction of *UBE2L6* by semi-quantitative RT-PCR.** Relative expression levels obtained from 3 independent experiments are shown in bar graphs. There was a significant difference in expression of 7 genes, including apoptotic protease activating factor 1 (*APAF1*), B-cell CLL/lymphoma 2 (*Bcl-2*), insulin growth factor 1 (*IGF1*), human tissue inhibitor of metalloproteinases-3 (*TIMP3*), interferon alpha 1 (*IFNA1*), nuclear factor of kappa light polypeptide gene enhancer in B-cells inhibitor, alpha (*NFKBIA*) and nuclear factor of kappa light polypeptide gene enhancer in B-cells 1 (*NFKB1*).

\* $p < 0.05$ , \*\* $p < 0.01$ .

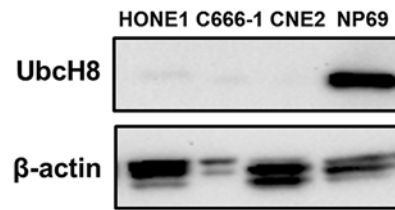

**Supplementary Figure S3: UbcH8 was downregulated in NPC cell lines.** Western blot analysis of the UbcH8 expression in NPC cell lines (HONE, C666-1 and CNE2) and normal epithelial cell line NP69.  $\beta$ -actin was used as an endogenous control.

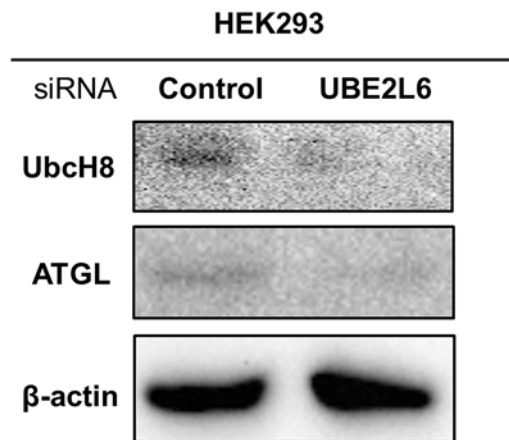

**Supplementary Figure S4: Knock-down of UbcH8 in HEK 293 cells downregulates the expression of ATGL.** Cells were transfected with either siRNA against UbcH8 (siUbcH8) or siRNA against irrelevant RNA (siControl). Forty-eight hours post-transfection cells were lysed and samples of total cell proteins were analysed by Western blot, for UbcH8 and ATGL expression.  $\beta$ -Actin was used as an endogenous control.

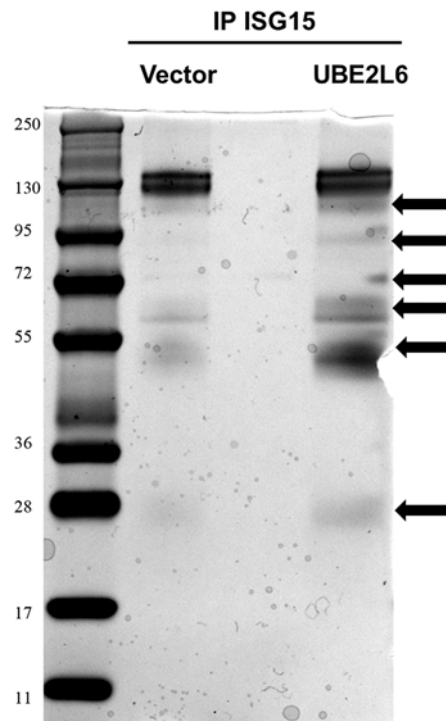

**Supplementary Figure S5: Exogenous expression of UbcH8 induces increased ISG15ylation.** CNE2 cells were transfected with either an empty vector or an *UBE2L6*-coding plasmid. Forty-eight hours post-transfection, cells were lysed and immunoprecipitation with ISG15 antibody were performed. ISG15ylated proteins were resolved on a polyacrylamide gel in denaturing condition and stained with silver. Arrows point to the ISG15ylated proteins.

**Supplementary Table S1: Primer sequences used in this study**

|                          | Primers                    | sequence(5'-3')            |
|--------------------------|----------------------------|----------------------------|
| RT-PCR                   | UBE2L6                     | F:AAACACTGGCCGATCACCT      |
|                          |                            | R:TGACCAAGATATCCTCCTCTGT   |
|                          | APAF1                      | F:CTGCCATAAGCCCTGTCCTCCA   |
|                          |                            | R:ATTCTGGGTCCGGGTGCAGTT    |
|                          | Bcl-2                      | F:TGGCAGGAGGGGCAAGGTGGA    |
|                          |                            | R:GCAGGTCGGTGAGCTGCCAGGATG |
|                          | IGF1                       | F:CGGCAAAGAAGTTGAACGAGTGG  |
|                          |                            | R:TGCACAAGGGAGGTGTGTTGGTAA |
|                          | TIMP3                      | F:GTAACCTGCGGATTGGCTTCG    |
|                          |                            | R:GAAGCGGGTCACCTGGTCAGT    |
|                          | IFNA1                      | F:GTGGTGGGACCAGGGAGATTG    |
|                          |                            | R:TTCAGCGTATCCGAGGACTTCTT  |
|                          | NFKB1                      | F:CCGGCTCGCAGGTCTCAAC      |
|                          |                            | R:TCACCGGGCCGAGGTTAC       |
|                          | NFKBIA                     | F:GCTCTCCTGTTGTGCTTCTCCACT |
|                          |                            | R:AGCTGCTTAATCTCCTCAGGGATG |
| GAPDH                    | F:CTTCTGAGTTGCCAGGAGACCACT |                            |
|                          | R:TCAACCACTCACACACACAACCA  |                            |
| Real-time RT-PCR         | ISG15                      | F:CAACAAGCCCACAGGGTATGGCT  |
|                          |                            | R:TGGGCATGTCCGGTGTGGCGCT   |
|                          | GAPDH                      | F:CAGGAGTTTGGGTCTGCAGTGTGA |
|                          |                            | R:TGGAGGAGGGAGTCCGATAGAAGC |
| Methylation Specific PCR | UBE2L6-M                   | F:GCATTGGCAAAGGTTCGATTTGG  |
|                          |                            | R:TCGCCGTGGACAGAGCAAGTT    |
|                          | UBE2L6-U                   | F:CGAAGGTCCTACAGGGCCACAAC  |
|                          |                            | R:CTCGCAAGAAATGCCACATGAA   |
| Bisulphite sequencing    | UBE2L6-BISQ                | F:AAGCTCACTGGCATGGCCTT     |
|                          |                            | R:CTCTCTCCTCTTGTGCTCTTG    |
